# Supplementary material for: Facile synthesis and shape evolution of highly symmetric 26-facet polyhedral microcrystals of Cu2O
Source: Royal Society of Chemistry journal article supplement (doi:10.1039/b912034n), 2009-01-01
Supplement: b912034n.pdf [file b912034n.pdf]

### Supplementary Information

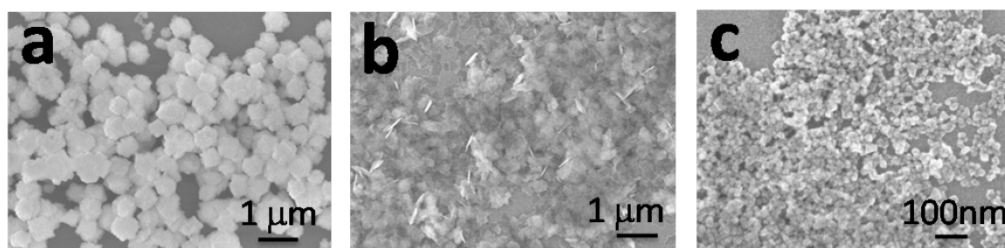

Fig. S1. FESEM images of the samples obtained by changing the  $C_6H_5Na_3O_7 \cdot 2H_2O$  with (a) NaCl; (b)  $Na_2SO_4$ ; (c)  $NaNO_3$ .

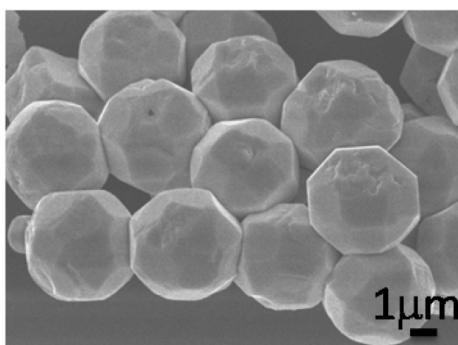

Fig. S2. FESEM image of the sample obtained in the absence of SDS.
